# Supplementary material
Source: PubMed Central journal article supplement (PMC3076991)

## Supporting Information

### Land use regression modelling to estimate historic (1962-1991) exposures to black smoke and sulphur dioxide for Great Britain

John Gulliver<sup>1</sup>, Chloe Morris<sup>1</sup>, Kayoung Lee<sup>1</sup>, Danielle Vienneau<sup>1</sup>, David Briggs<sup>1</sup>, and Anna Hansell<sup>1</sup>.

1. MRC-HPA Centre for Environment and Health, Department of Epidemiology & Biostatistics, Imperial College London, London, UK.

#### Contents

Tables:

- S1. Mean and variability of monitored concentrations ( $\mu\text{g}/\text{m}^3$ ) across Great Britain.
- S2. Predictor variables offered in the development of LUR models.
- S3. Development of LUR models for Black smoke by year
- S4. Development of LUR models for  $\text{SO}_2$  by year
- S5. Correlation (Pearson's R) between monitoring sites common to each pair of years.
- S6. Comparison between the range of  $R^2$  from the 'leave-one-out' analysis and overall  $R^2$  from model evaluation.

Figures:

- S1. Model evaluation for black smoke: predicted versus observed concentrations ( $\mu\text{g}/\text{m}^3$ )
- S2. Model evaluation for  $\text{SO}_2$ : predicted versus observed concentrations in ( $\mu\text{g}/\text{m}^3$ )

As can be seen in Figure 1, BS models for 1962 and 1971 show some heteroscedasticity and the overall model under-prediction can be seen to be related to higher concentrations. For 1981 and 1991 the heteroscedasticity is less obvious due to the large under-prediction for about 10% of the evaluation sites. The scatter-plot for the 1962  $\text{SO}_2$  model (Figure 2) is homoscedastic, with only a slight under-prediction at higher concentrations. For  $\text{SO}_2$  in 1971 and 1981 there is slight heteroscedasticity but overall only slight under-prediction, and in 1981 the dominance of poor predictions for two monitoring sites, as mentioned above, is evident. The weaker result for the 1991  $\text{SO}_2$  model is exemplified by the large amount of scatter between the monitoring sites.

S3. Modelled black smoke concentrations for 1962, 1971, 1981, and 1991

S4. Modelled sulphur dioxide concentrations for 1962, 1971, 1981, and 1991

Table S1. Mean and variability of monitored concentrations ( $\mu\text{g}/\text{m}^3$ ) across Great Britain

| Pollutant       | Year | Min  | 5%   | Mean  | 95%   | Max   | S.D. | Skewness | N   |
|-----------------|------|------|------|-------|-------|-------|------|----------|-----|
| BS              | 1962 | 2.8  | 47.0 | 143.8 | 314.1 | 575.0 | 84.6 | 1.2      | 667 |
|                 | 1971 | 1.2  | 14.3 | 52.2  | 114.7 | 280.5 | 33.3 | 1.5      | 958 |
|                 | 1981 | 0.9  | 7.0  | 19.5  | 41.3  | 105.5 | 11.6 | 2.3      | 964 |
|                 | 1991 | 2.5  | 5.2  | 15.9  | 30.2  | 48.2  | 7.8  | 1.0      | 192 |
| SO <sub>2</sub> | 1962 | 3.7  | 49.8 | 160.5 | 301.9 | 449.7 | 77.8 | 0.7      | 603 |
|                 | 1971 | 10.2 | 31.7 | 95.3  | 179.9 | 288.8 | 47.0 | 0.8      | 916 |
|                 | 1981 | 2.5  | 17.5 | 47.5  | 84.5  | 190.9 | 22.0 | 1.2      | 945 |
|                 | 1991 | 11.9 | 15.6 | 34.9  | 62.4  | 90.2  | 14.5 | 0.8      | 191 |

Annual averages were computed from daily averages for monitoring stations with at least 75% data capture across the year

**Table S2. Predictor variables offered in the development of LUR models.**

| Variables  |                                                                                                                                                                                                                   | Direction of Effect | Point | Buffer (km) |   |   |   |   |   |     |    |
|------------|-------------------------------------------------------------------------------------------------------------------------------------------------------------------------------------------------------------------|---------------------|-------|-------------|---|---|---|---|---|-----|----|
| Type       | Description                                                                                                                                                                                                       |                     |       | 0.5         | 1 | 2 | 3 | 4 | 5 | 7.5 | 10 |
| Roads      | Length of motorways (m)                                                                                                                                                                                           | +                   |       | X           | X | X | X |   |   |     |    |
|            | Length of A-roads (m)                                                                                                                                                                                             | +                   |       | X           | X | X | X |   |   |     |    |
|            | Length of B-roads                                                                                                                                                                                                 | +                   |       | X           | X | X | X |   |   |     |    |
|            | Length of minor roads                                                                                                                                                                                             | +                   |       | X           | X | X | X |   |   |     |    |
|            | Major roads: length of motorways + A-roads <sup>a</sup>                                                                                                                                                           | +                   |       | X           | X | X | X |   |   |     |    |
|            | Length of B-roads + minor roads <sup>a</sup>                                                                                                                                                                      | +                   |       | X           | X | X | X |   |   |     |    |
| Land cover | High density residential (m <sup>2</sup> )                                                                                                                                                                        | +                   |       | X           | X | X | X | X | X | X   | X  |
|            | Low density residential (m <sup>2</sup> )                                                                                                                                                                         | +                   |       | X           | X | X | X | X | X | X   | X  |
|            | Industry and commercial land (m <sup>2</sup> )                                                                                                                                                                    | +                   |       | X           | X | X | X | X | X | X   | X  |
|            | Ports (m <sup>2</sup> )                                                                                                                                                                                           | +                   |       | X           | X | X | X | X | X | X   | X  |
|            | Other urban: land associated with road and rail networks, and mine, dump and construction sites (m <sup>2</sup> )                                                                                                 | +                   |       | X           | X | X | X | X | X | X   | X  |
|            | Urban green space: Green urban areas + sport and leisure facilities (m <sup>2</sup> ) <sup>a</sup>                                                                                                                | -                   |       | X           | X | X | X | X | X | X   | X  |
|            | Forest (m <sup>2</sup> )                                                                                                                                                                                          | -                   |       | X           | X | X | X | X | X | X   | X  |
|            | Agriculture (m <sup>2</sup> )                                                                                                                                                                                     | -                   |       | X           | X | X | X | X | X | X   | X  |
|            | High density urban: <i>High density residential + industry</i> <sup>a</sup>                                                                                                                                       | +                   |       | X           | X | X | X | X | X | X   | X  |
|            | Low density urban:<br><i>low density residential + green urban areas + sport and leisure facilities + mine, dump and construction sites + airports + land associated with road and rail networks</i> <sup>a</sup> | +                   |       | X           | X | X | X | X | X | X   | X  |
|            | Non-residential, low density urban: <i>green urban areas + sport and leisure facilities + mine, dump and construction sites + airports + land associated with road and rail networks</i> <sup>a</sup>             | +                   |       | X           | X | X | X | X | X | X   | X  |
|            | Other natural areas: <i>scrub + open spaces + wetlands + waterways + coastal marshes and flats</i> <sup>a</sup>                                                                                                   | -                   |       | X           | X | X | X | X | X | X   | X  |
|            | Other natural areas + agriculture <sup>a</sup>                                                                                                                                                                    | -                   |       | X           | X | X | X | X | X | X   | X  |
|            | Other natural areas + forest <sup>a</sup>                                                                                                                                                                         |                     |       | X           | X | X | X | X | X | X   | X  |
| Population | Estimated counts from areal weighting                                                                                                                                                                             |                     |       | X           | X | X | X | X | X | X   |    |
| Trend      | Co-ordinates (x,y, x <sup>2</sup> , y <sup>2</sup> , xy)                                                                                                                                                          | +/-                 | X     |             |   |   |   |   |   |     |    |
| Altitude   | Height above sea level (m)                                                                                                                                                                                        | -                   | X     |             |   |   |   |   |   |     |    |
|            | Square of height above sea level (m)                                                                                                                                                                              | -                   | X     |             |   |   |   |   |   |     |    |

a. combined land cover or road variables.

**Table S3. Development of LUR models for Black smoke by year**

| Year (number of sites) | Variable type                              | Variable description                           | $\beta$      | P (sig)     | Adj R <sup>2</sup> | SEE  |
|------------------------|--------------------------------------------|------------------------------------------------|--------------|-------------|--------------------|------|
| 1962 (534)             | Trend surface                              | (constant)                                     | .970         | .087        |                    |      |
|                        |                                            | X                                              | 7.985e-006   | .001        |                    |      |
|                        |                                            | Y                                              | 9.890e-006   | .000        |                    |      |
|                        |                                            | X <sup>2</sup>                                 | -8.5610e-012 | .001        |                    |      |
|                        |                                            | Y <sup>2</sup>                                 | -8.903e-012  | .000        |                    |      |
|                        |                                            | XY                                             | -2.478e-012  | .080        | .501               | .440 |
|                        | Land cover                                 | Other natural areas and agriculture within 1km | -1.415e-007  | .000        | .609               | .389 |
|                        | Forest within 3 km                         | -6.391e-008                                    | .000         | .636        | .376               |      |
| Roads                  | Minor road and 'B' Road length within 3 km | 2.239e-006                                     | .000         | <b>.676</b> | <b>.354</b>        |      |
| 1971 (767)             | Trend surface                              | (constant)                                     | -1.965       | .000        |                    |      |
|                        |                                            | X                                              | 1.678e-005   | .000        |                    |      |
|                        |                                            | Y                                              | 7.835e-006   | .000        |                    |      |
|                        |                                            | X <sup>2</sup>                                 | -1.776e-011  | .000        |                    |      |
|                        |                                            | Y <sup>2</sup>                                 | -6.065e-012  | .000        |                    |      |
|                        |                                            | XY                                             | -3.397e-012  | .002        | .503               | .483 |
|                        | Roads                                      | Minor road and 'B' Road length within 1 km     | 1.749e-005   | .000        | .656               | .402 |
| Land cover             | Low density residential within 10 km       | 1.712e-009                                     | .000         | .670        | .394               |      |
| Roads                  | Major road length within 1km               | 3.153e-005                                     | .000         | <b>.680</b> | <b>.388</b>        |      |
| 1981 (771)             | Trend surface                              | (constant)                                     | -1.040       | .012        |                    |      |
|                        |                                            | X                                              | 1.1662e-005  | .000        |                    |      |
|                        |                                            | Y                                              | 5.752e-006   | .000        |                    |      |
|                        |                                            | X <sup>2</sup>                                 | -1.134e-011  | .000        |                    |      |
|                        |                                            | Y <sup>2</sup>                                 | -3.402e-012  | .000        |                    |      |
|                        |                                            | XY                                             | -5.757e-012  | .000        | .270               | .479 |
|                        | Land cover                                 | Forest and other natural areas within 1km      | -2.749e-007  | .000        | .330               | .458 |
|                        | Other urban areas within 10km              | 5.227e-008                                     | .000         | .371        | .444               |      |
| Roads                  | Minor Road and 'B' Road length within 1 km | 1.129e-005                                     | .000         | <b>.408</b> | <b>.431</b>        |      |
| 1991 (155)             | Trend surface                              | (constant)                                     | -5.765       | .006        |                    |      |
|                        |                                            | X                                              | 2.409e-005   | .003        |                    |      |
|                        |                                            | Y                                              | 1.748e-005   | .000        |                    |      |
|                        |                                            | X <sup>2</sup>                                 | -2.001e-011  | .011        |                    |      |
|                        |                                            | Y <sup>2</sup>                                 | -1.041e-011  | .000        |                    |      |
|                        |                                            | XY                                             | -1.972e-011  | .000        | .345               | .450 |
|                        | Land Cover                                 | Forest and other natural areas within 10 km    | -2.287e-009  | .016        | .372               | .440 |
|                        | Other urban areas within 7.5 km            | 4.3238e-008                                    | .022         | <b>.390</b> | <b>.434</b>        |      |

N.B. Trend surface variables were entered in all cases as a group (e.g. X,Y,X<sup>2</sup>, Y<sup>2</sup>, XY)

**Table S4. Development of LUR models for SO2 by year**

| Year (number of sites) | Variable type                  | Variable description                                                                                          | $\beta$     | P (sig)     | Adj R <sup>2</sup> | SEE         |
|------------------------|--------------------------------|---------------------------------------------------------------------------------------------------------------|-------------|-------------|--------------------|-------------|
| 1962 (482)             | Trend surface                  | (constant)                                                                                                    | -0.048      | .937        |                    |             |
|                        |                                | X                                                                                                             | 9.713e-006  | .000        |                    |             |
|                        |                                | Y                                                                                                             | 1.238e-005  | .000        |                    |             |
|                        |                                | X2                                                                                                            | -7.295e-012 | .009        |                    |             |
|                        |                                | Y2                                                                                                            | -1.055e-011 | .000        |                    |             |
|                        |                                | XY                                                                                                            | -9.170e-012 | .000        | .279               | .473        |
|                        | Roads                          | Minor road length within 3 km                                                                                 | 1.943e-006  | .000        | .552               | .373        |
| Land cover             | Low density urban within 10km  | 2.564e-009                                                                                                    | .000        | .573        | .364               |             |
|                        | High density urban within 1km  | 1.535e-007                                                                                                    | .000        | <b>.605</b> | <b>.350</b>        |             |
| 1971 (733)             | Roads                          | (constant)                                                                                                    | 0.290       | .306        |                    |             |
|                        |                                | Minor road length within 3km                                                                                  | 1.937e-006  | .000        | .390               | .444        |
|                        | Trend surface                  | X                                                                                                             | 1.156e-005  | .000        |                    |             |
|                        |                                | Y                                                                                                             | 4.772e-006  | .000        |                    |             |
|                        |                                | X2                                                                                                            | -1.092e-011 | .000        |                    |             |
|                        |                                | Y2                                                                                                            | -3.767e-012 | .000        |                    |             |
|                        |                                | XY                                                                                                            | -3.543e-012 | .001        | .594               | .362        |
|                        | Land cover                     | Industrial and commercial land within 10km [compound ring variable: (<=3km * 0.84) + (> 3km & <=10km * 0.16)] | 4.107e-008  | .000        | .620               | .351        |
| Roads                  | Major road length within 3km   | 7.108e-006                                                                                                    | .000        | .633        | .344               |             |
| Land cover             | Low density urban within 10km  | 1.839e-009                                                                                                    | .000        | <b>.649</b> | <b>.337</b>        |             |
| 1981 (756)             | Trend surface                  | (constant)                                                                                                    | 0.975       | .006        |                    |             |
|                        |                                | X                                                                                                             | 8.284e-006  | .000        |                    |             |
|                        |                                | Y                                                                                                             | 3.701e-006  | .000        |                    |             |
|                        |                                | X2                                                                                                            | -7.643e-012 | .000        |                    |             |
|                        |                                | Y2                                                                                                            | -2.984e-012 | .000        |                    |             |
|                        |                                | XY                                                                                                            | -3.406e-012 | .002        | .244               | .446        |
|                        | Land cover                     | Low density urban within 10 km                                                                                | 2.095e-009  | .000        | .330               | .420        |
|                        |                                | Other urban within 10km                                                                                       | 3.637e-008  | .000        | .352               | .413        |
|                        | High density urban within 2 km | 3.946e-008                                                                                                    | .000        | <b>.378</b> | <b>.404</b>        |             |
| 1991 (153)             | Trend surface                  | (Constant)                                                                                                    | 2.495       | .000        |                    |             |
|                        |                                | Y                                                                                                             | 4.050e-006  | .000        |                    |             |
|                        |                                | Y2                                                                                                            | -4.619e-012 | .000        | .168               | .373        |
|                        | Land cover                     | Other urban within 7.5km                                                                                      | 4.569e-008  | .001        | .218               | .362        |
|                        |                                | Low density urban within 10 km                                                                                | 1.387e-009  | .016        | <b>.243</b>        | <b>.356</b> |

N.B. Trend surface variables were entered in all cases as a group (e.g. X,Y,X<sup>2</sup>, Y<sup>2</sup>, XY)

Table S5. Correlation (Pearson's R) between monitoring sites common to each pair of years.

| Pollutant       | Year  | R    | p    | Number of sites |
|-----------------|-------|------|------|-----------------|
| Black smoke     | 62-91 | 0.53 | .005 | 27              |
|                 | 71-91 | 0.60 | .000 | 52              |
|                 | 81-91 | 0.68 | .000 | 26              |
|                 | 62-71 | 0.76 | .000 | 335             |
|                 | 62-81 | 0.41 | .000 | 174             |
|                 | 71-81 | 0.56 | .000 | 149             |
| Sulphur dioxide | 62-91 | 0.26 | .201 | 25              |
|                 | 71-91 | 0.61 | .000 | 51              |
|                 | 81-91 | 0.70 | .000 | 106             |
|                 | 62-71 | 0.83 | .000 | 305             |
|                 | 62-81 | 0.31 | .000 | 155             |
|                 | 71-81 | 0.58 | .000 | 380             |

Table S6. Comparison between the range of R<sup>2</sup> from the 'leave-one-out' analysis and overall R<sup>2</sup> from model evaluation.

| Pollutant       | Year | Model performance against 20% retained sites (as in Table 2, main paper) | Model performance using 'leave-one-out' analysis |
|-----------------|------|--------------------------------------------------------------------------|--------------------------------------------------|
|                 |      | Adj R <sup>2</sup>                                                       | Range of R <sup>2</sup>                          |
| Black smoke     | 1962 | .56                                                                      | 0.54-0.58                                        |
|                 | 1971 | .41                                                                      | 0.40-0.45                                        |
|                 | 1981 | .38                                                                      | 0.36-0.40                                        |
|                 | 1991 | .34                                                                      | 0.30-0.37                                        |
| Sulphur dioxide | 1962 | .71                                                                      | 0.69-0.74                                        |
|                 | 1971 | .57                                                                      | 0.55-0.60                                        |
|                 | 1981 | .26                                                                      | 0.25-0.31                                        |
|                 | 1991 | .31                                                                      | 0.28-0.37                                        |

Figure S1. Model evaluation for black smoke: predicted versus observed concentrations ( $\mu\text{g}/\text{m}^3$ ) by year (N.B. scales vary by plots)

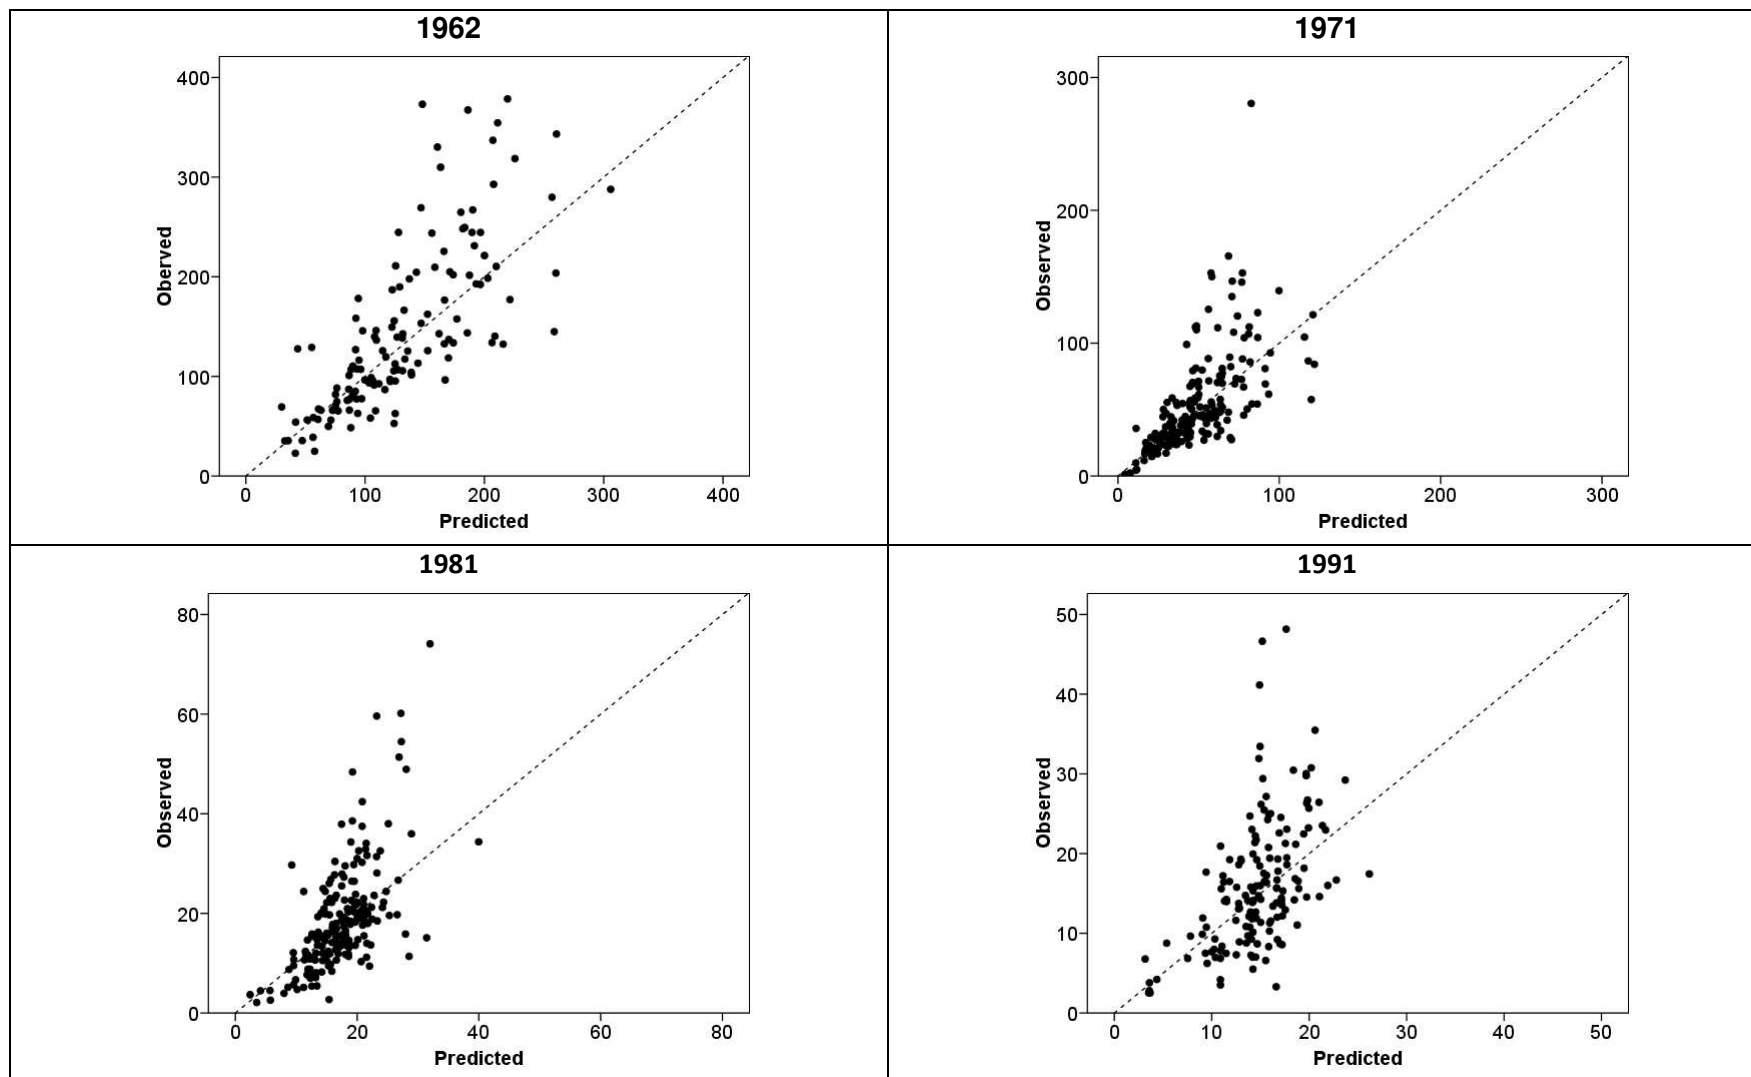

Figure S2. Model evaluation for SO<sub>2</sub>: predicted versus observed concentrations in ( $\mu\text{g}/\text{m}^3$ ) by year (N.B. scales vary by plots)

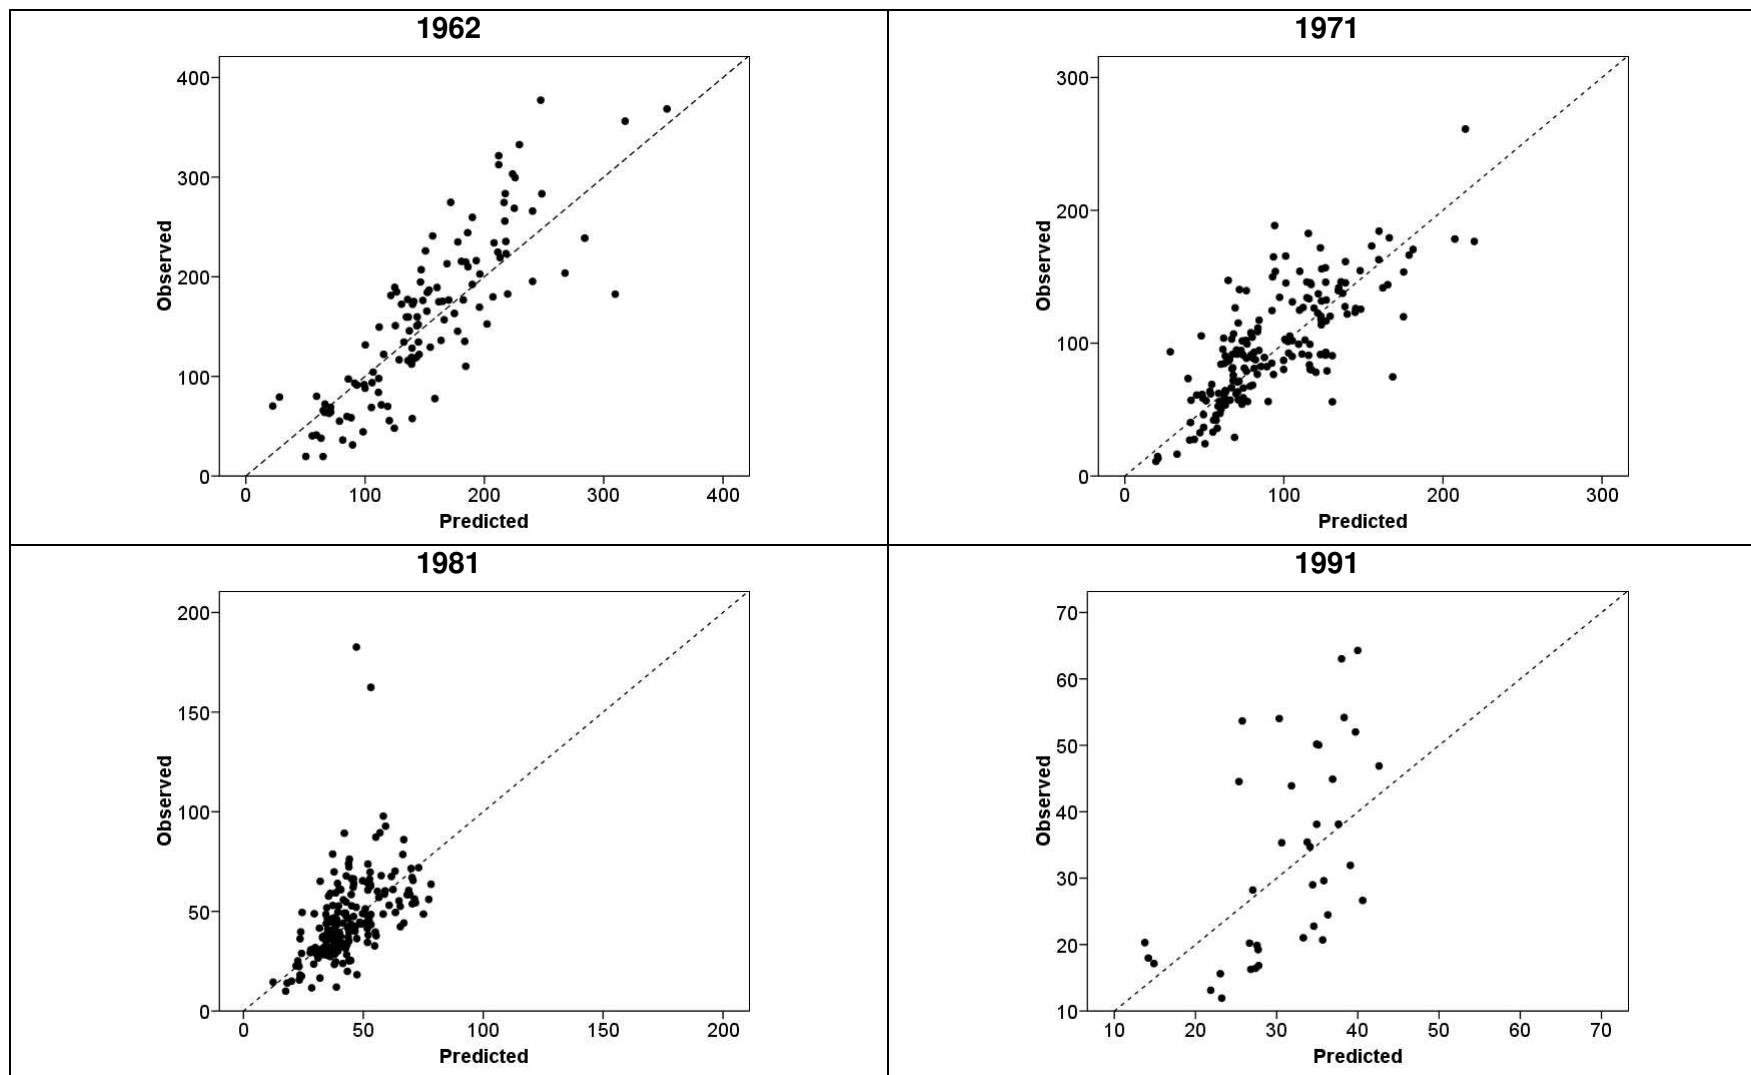



Figure S3. Modelled black smoke concentrations for 1962, 1971, 1981, and 1991

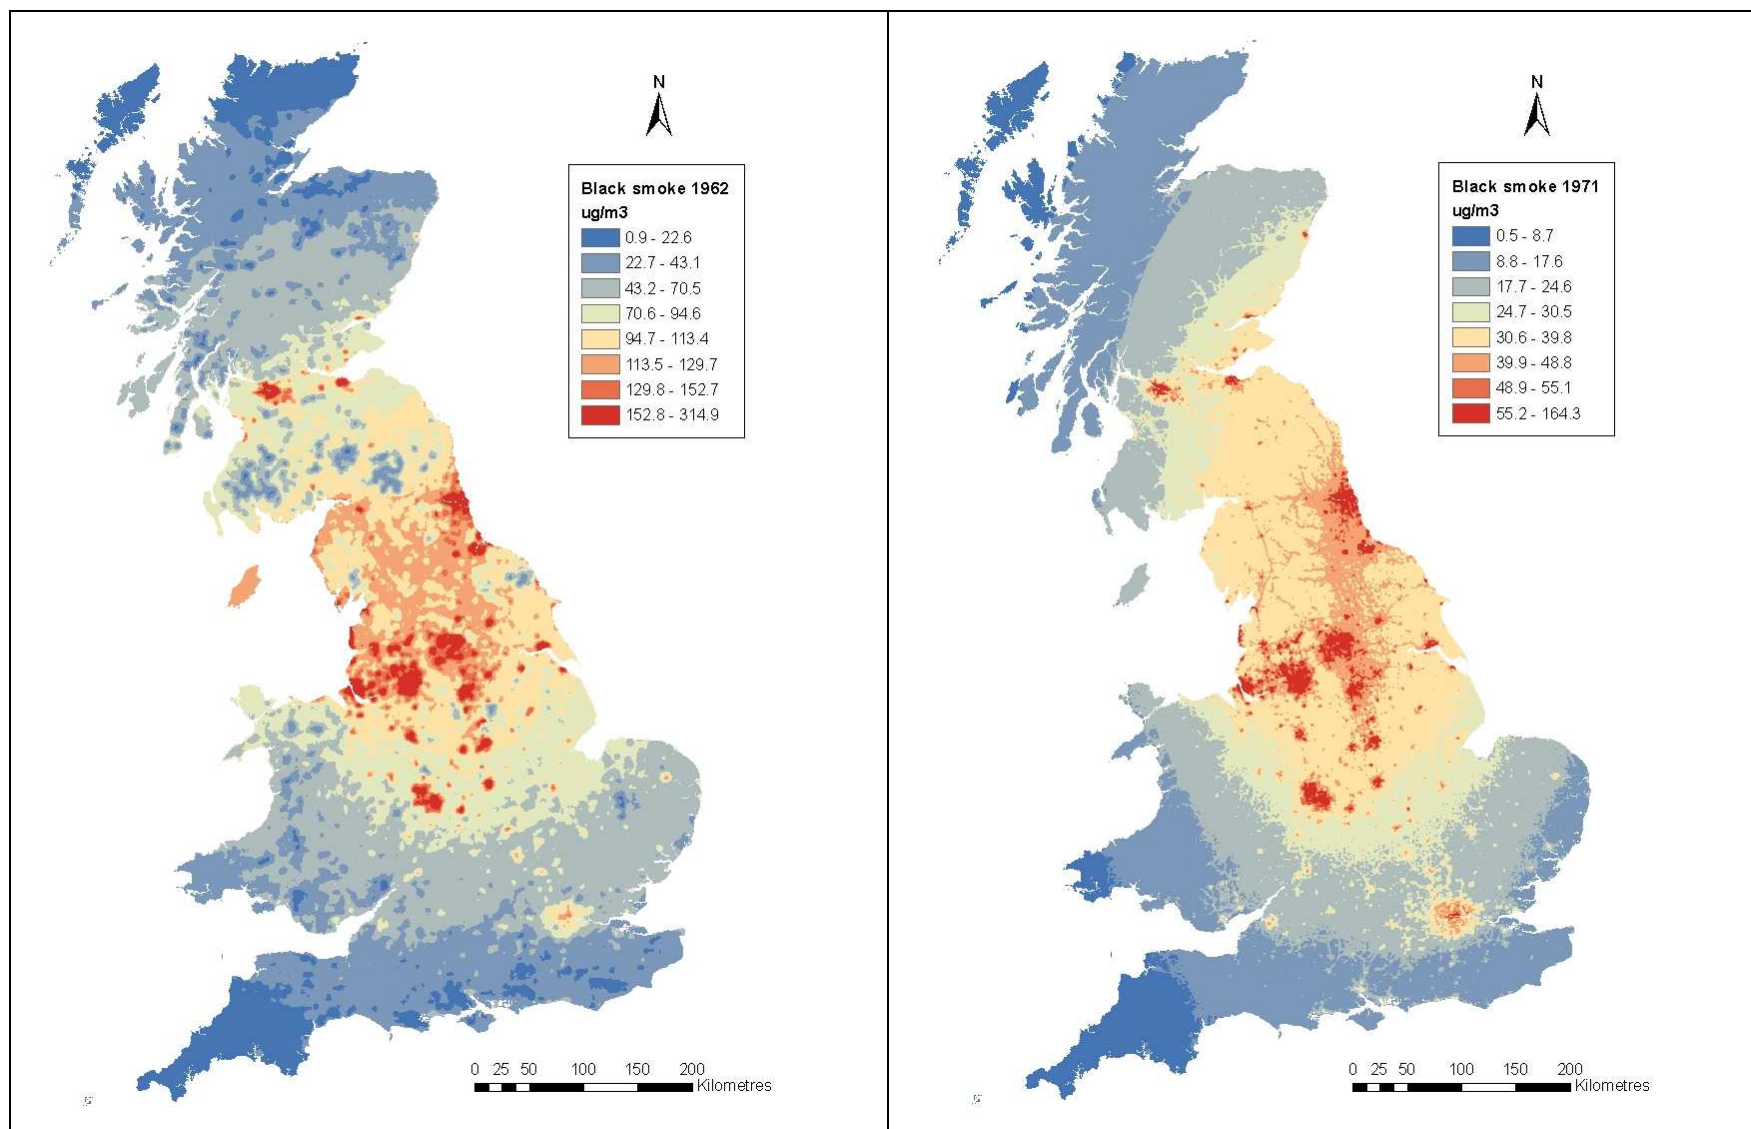

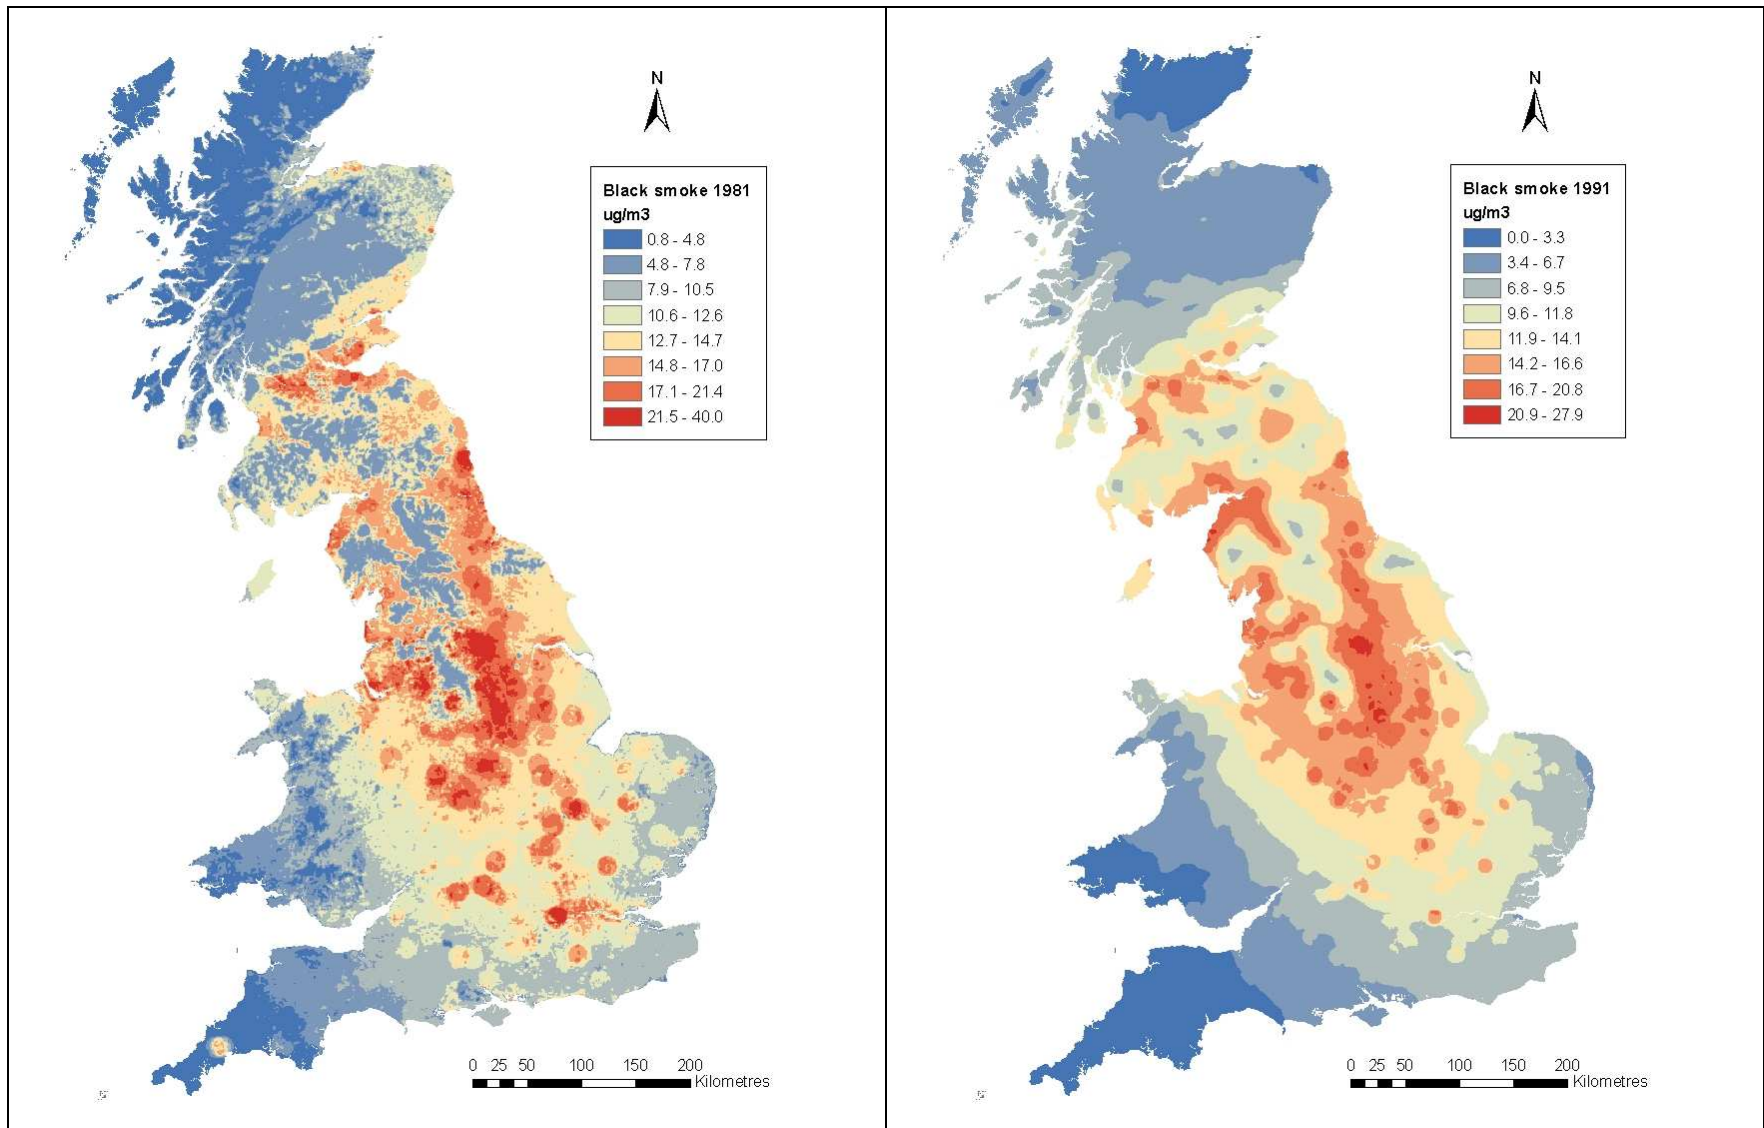

Figure S4. Modelled sulphur dioxide concentrations for 1962, 1971, 1981, and 1991

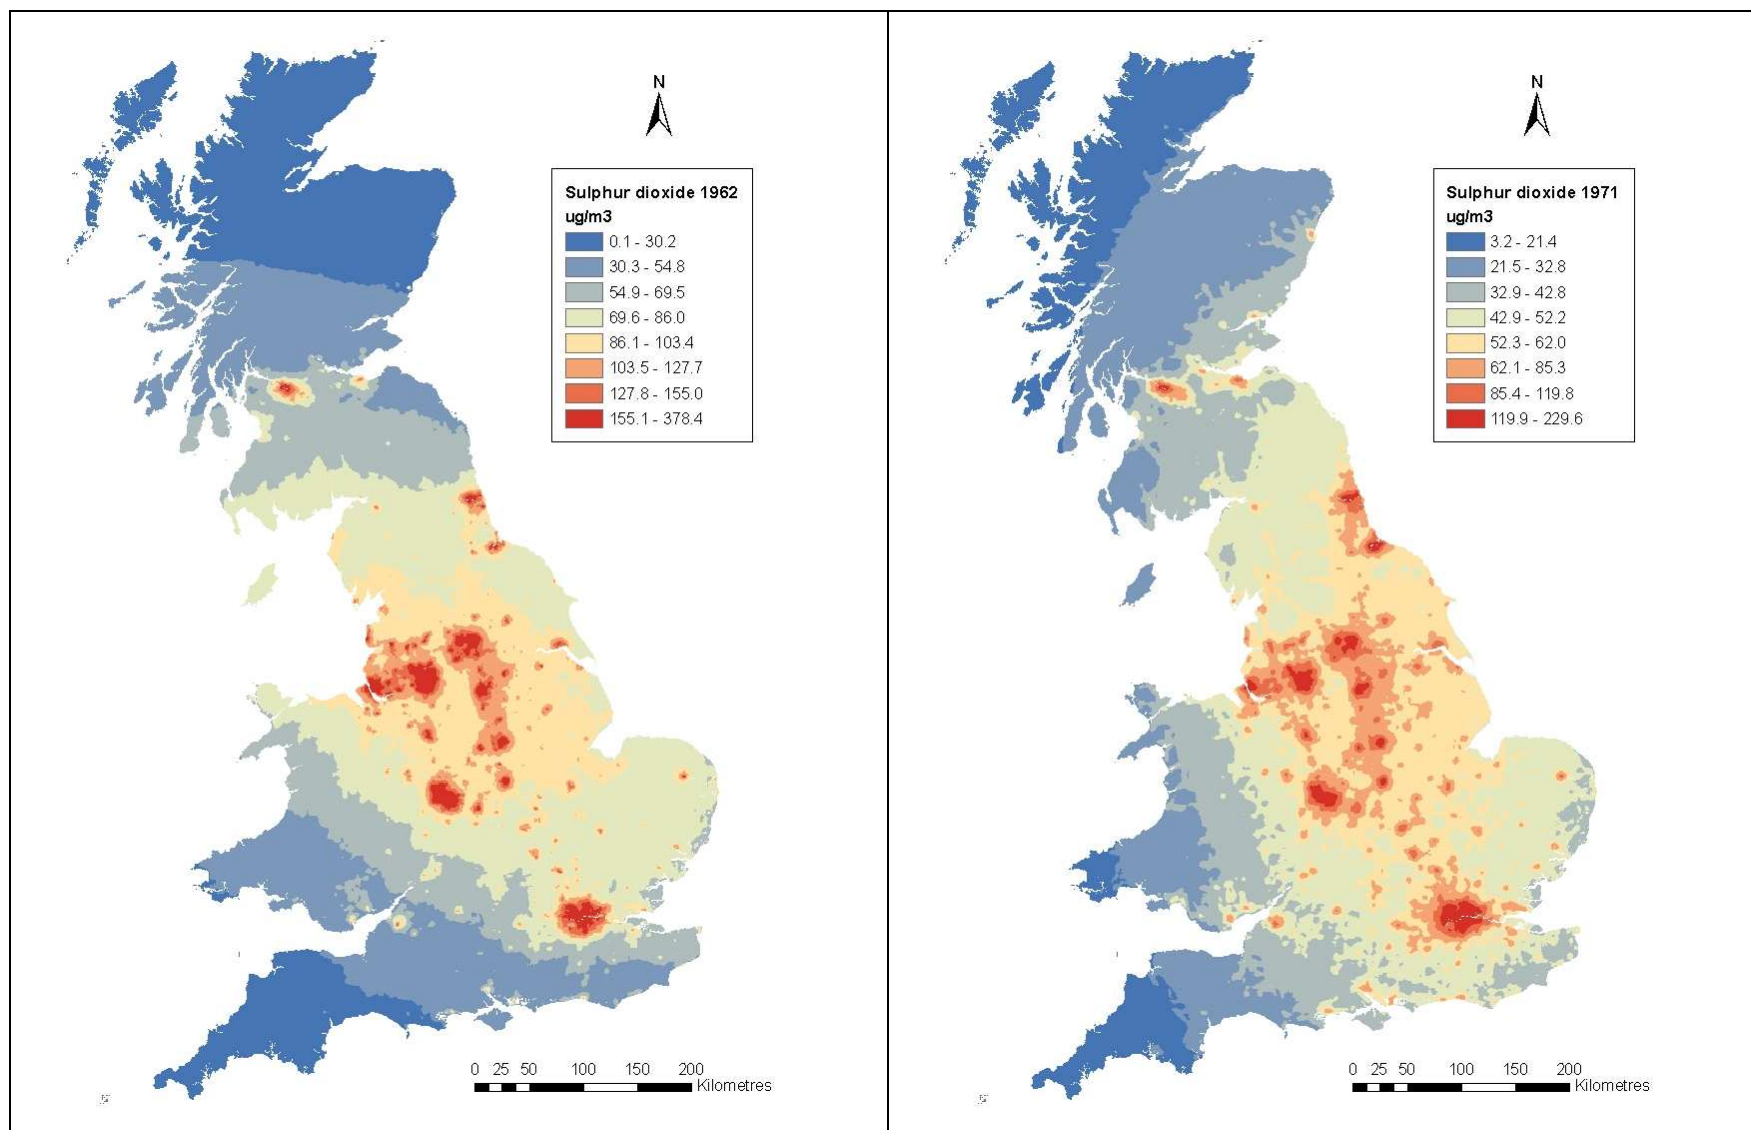

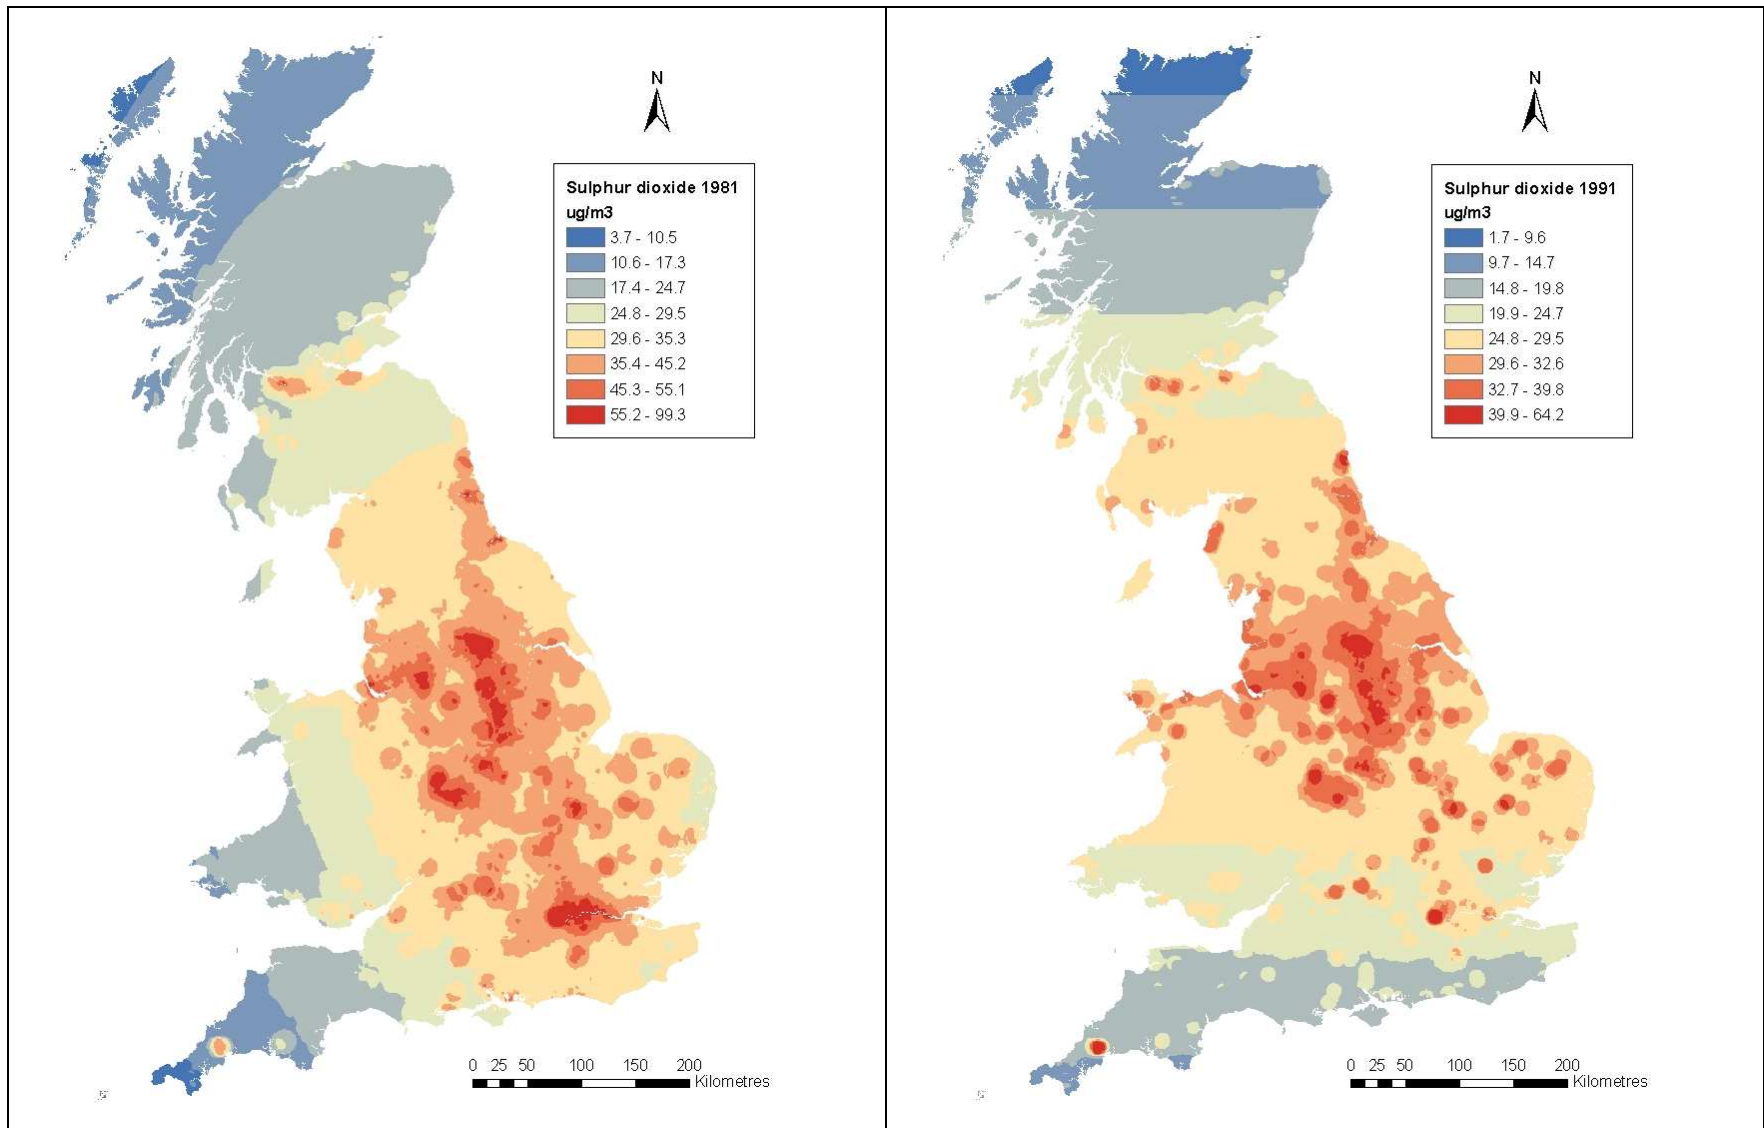

Supplement: es103821y_si_001.pdf [file es103821y_si_001.pdf]
